# Supplementary material
Source: MDPI journal article supplement (https://www.mdpi.com/2073-4395/13/7/1681)
Supplement: s1 [file s1]

Text S1: Primer sequences of PCR and *CgloRPCYG*, *Hyg*, and *Bar* genes sequences. The sequence of sgRNA was as follows: *CgloRPCYG* sgRNA02: 5'-AACCACCTGACGATGCTTGT-3'. The underlined sequence of 150 bp length is the deletion sequence of  $\Delta CgloRPCYG-1$  by CRISPR/Cas 9 knockout. Other primers with different highlighted colors are shown in Table S1.

| Table S1 Primers used for PCR and PCR products expected length |                      |                     |      |               |      |               |
|----------------------------------------------------------------|----------------------|---------------------|------|---------------|------|---------------|
| Primer name                                                    | Sequence (5'-3')     | Expected length /bp |      |               |      |               |
|                                                                |                      | W                   | EV   | CEV           | KO   | CKO           |
| <i>CgloRPCYG</i> -F                                            | ATGGAAGCCGCCGTCCTCG  | 792                 | 792  | 792           | 0    | 684           |
| <i>CgloRPCYG</i> -R                                            | TTACCACGCCATCAGGCTC  |                     |      |               |      |               |
| <i>Hyg</i> -F                                                  | GCAGACAGGAACGAGGAC   | 0                   | 1194 | not detection | 1194 | not detection |
| <i>Hyg</i> -R                                                  | GGTCGGCATCTACTCTATTC |                     |      |               |      |               |
| <i>Bar</i> -F                                                  | TCAATCTCGGTGACGGGCA  | 0                   | 0    | 552           | 0    | 552           |
| <i>Bar</i> -R                                                  | ATGAGCCCAGAACGACGC   |                     |      |               |      |               |
| <i>CgloRPCYG</i> -D-F                                          | TGTCTCCCGTTTCTTGACTC | 656                 | 656  | not detection | 506  | not detection |
| <i>CgloRPCYG</i> -D-R                                          | AGCAAAGGTGAAGCCACT   |                     |      |               |      |               |

>*CgloRPCYG* DNA sequence

TGTCTCCCGTTTCTTGACTCTTTCTTGTGCGCCGCTTGGTCTTTTCTGCGTTTCTGCAAGT  
 CATTCTTTGATCAACTGCCTTCCACTCTTTTAAAGTTTAAACCAGCGACGATCAGCTCG  
 ACCATCGATATCATCACTCGACTTCCGCTCGTTTAAACCCGCAAAACCTAATAACCTAA  
 AAAACCAAAAACCTCATTACAAATGGAAGCCGCCGTCCTCGCAACCCCGACCGTGCC  
 CGTGTCGCCCATGACGATCACCCCGATCCCGACCGCGGCGGTCTCGAGCTCCGCGA  
 CAAGCAGGTGCGCTCTCAGACGACCTTACCCCGCCCGCTCACTGCACCGAGAAC  
 CACCTGACGATGCTTGTTCGGCGCTGGAGAAGATCTGGATCAACGAGCCTGTGCCC  
 CTTCCTCAACTCGACCATCACATCATGCTACCCTACGGAATGGGTCAACGGATACTCCT  
 CCGTCATGTCAAAGTCCAGCTCCATGGCACCCGTCATGAGCCCTCTGGTCTGCCCCAG  
 CGGATGGAACACTGTTAGCAGCACCTGGTCAAGCGGCTACATCGCCTGCTGCGCTGA  
 GTACGTTTGATCTCGTTCCTGAGTATCGATTGGAACACGCATGCTAATAAACTGAAAT  
 CAGTGGCTTACCTTTGCTGCTCCTACCAAGACCGCCGACCGCGACCGTCTGCTAC  
 GGCGGAACCTGCTACAGCAACTTCGACCTCAGCCAGACCGCCACCGTCACCGTCTAC  
 AACCCCGTCGAGCTCTCCACCACCATTGCATGGGTGCGGACTACGACTCCAGCCAG  
 GCCTACAACCATCCCATCGAAGGTTTCGCCATGGACTACACACCGACAACATCGGCT  
 GCCACGGCTCAAGAGTCAAGCGCCGGCACCCAGAAGTCCGACGAGAAGTCCGCGCC  
 GAGGTCAAGCGGCAACTCCAAGGCGGCCATCGTCATTGGAGTCTGCTCGCGAGCCT  
 GATGGCGTGGTAAATTGCCCCGACCTTGATGAGCGGCCAGCCAAGATGTTACGA

>*CgloRPCYG* ORF sequence

ATGGAAGCCGCCGTCCTCGCAACCCCGACCGTGCCCGTGTGCGCCATGACGATCACC  
 CCGATTCCGACCGCGGCGGTCTCGAGCTCCGCGACAAGCAGAACCACCTGACGATG  
 CTTGTGCGCGCGCTGGAGAAGATCTGGATCAACGAGCCTGTGCCCCTTCCCAACTCG  
 ACCATCACATCATGCTACCCTACGGAATGGGTCAACGGATACTCCTCCGTCATGTCAA  
 AGTCCAGCTCCATGGCACCCGTCATGAGCCCTCTCGTCTGCCCCAGCGGATGGAACA  
 CTGTTAGCAGCACCTGGTCAAGCGGCTACATCGCCTGCTGCGCTGATGGCTTACCTT  
 TGCTGCTCCACCAAGACCGCCGACCGCGACCGTCTGCTACGGCGGAACCTGCTA  
 CAGCAACTTCGATCTCAGCCAGACCGCCACCGTCACCGTCTACAACCCCGTCGAGCT  
 CTCCACCACCATCGCATGGGTGCGGACTACGACCCAGCCCAGGCCTACAACCATCC

CATCGAAGGTTTCGCCATGGACTACACACCGACAACATCGGCTGCCACGGCTCAAGA  
GTCCAGCGCCGGCACCCAGAACTCCGACGAGAACTCCGCGCCGAGGTCAGGCGGCA  
ACTCCAAGGCGGCTATCGTCATTGGAGTCCTGCTCG**CGAGCCTGATGGCGTGTTAA**

>Hyg sequence

AGCTCGGTACCCGGGGATCCTCTAGAGTCGACGTTAACTGATATTGAAGGAGCATTTT  
TTGGGCTTGGCTGGAGCTAGTGGAGGTCAACAATGAATGCCTATTTTGGTTTAGTCGT  
CCAGGCGGTGAGCACAAAATTTGTGTCGTTTGACAAGATGGTTCATTTAGGCAACTG  
GTCAGATCAGCCCCACTTGTAGCAGTAGCGGCGGCGCTCGAAGTGTGACTCTTATTAG  
**CAGACAGGAACGAGGACAT**TATTATCATCTGCTGCTTGGTGCACGATAACTTGGTGC  
GTTTGTCAAGCAAGGTAAGTGGACGACCCGGTCATACCTTCTTAAGTTCGCCCTTCCT  
CCCTTTATTTTCAAGTTCATCTGACTTACCTATTCTACCCAAGCATCCAAATGAAAAA  
GCCTGAACTCACCGCGACGTCTGTCGAGAAGTTTCTGATCGAAAAGTTCGACAGCGT  
CTCCGACCTGATGCAGCTCTCGGAGGGCGAAGAATCTCGTGCTTTCAGCTTCGATGTA  
GGAGGGCGTGATATGTCCTGCGGGTAAATAGCTGCGCCGATGGTTTCTACAAAGAT  
CGTTATGTTTATCGGCACTTTGCATCGGCCGCGCTCCCGATTCCGGAAGTGCTTGACA  
TTGGGGAGTTCAGCGAGAGCCTGACCTATTGCATCTCCCGCCGTGCACAGGGTGTCA  
CGTTGCAAGACCTGCCTGAAACCGAACTGCCCCGTGTTCTCCAGCCGGTTCGCGGAGG  
CCATGGATGCGATCGCTGCGGCCGATCTTAGCCAGACGAGCGGGTTCGGCCCATTCG  
GACCGCAAGGAATCGGTCAATACACTACATGGCGTGATTTTCATATGCGCGATTGCTG  
ATCCCCATGTGTATCACTGGCAAACCTGTGATGGACGACACCGTCAGTGCGTCCGTGCG  
GCAGGCTCTCGATGAGCTGATGCTTTGGGCCGAGGACTGCCCCGAAGTCCGGCACCT  
CGTGATGCGGATTTTCGGCTCCAACAATGTCTGACGGACAATGGCCGCATAACAGC  
GGTCATTGACTGGAGCGAGGCGATGTTTCGGGGATTCCCAATACGAGGTGCCAACAT  
CCTCTTCTGGAGGCCGTGGTTGGCTTGTATGGAGCAGCAGACGCGCTACTTCGAGCGG  
AGGCATCCGGAGCTTGCAGGATCGCCGCGCCTCCGGGCGTATATGCTCCGCATTGGT  
CTTGACCAACTCTATCAGAGCTTGGTTGACGGCAATTTTCGATGATGCAGCTTGGGCGC  
AGGGTCGATGCGACGCAATCGTCCGATCCGGAGCCGGGACTGTGCGGCGTACACAA  
ATCGCCCGCAGAAGCGCGGCCGTCTGGACCGATGGCTGTGTAGAAGTACTCGCCGAT  
AGTGGAACCGACGCCCCAGCACTCGT**CCGAGGGCAAAGGAATAGAG**TAGATGCCG  
ACCGGAACCAGTTAACGTCGACCTGCAGGCATGCA

>Bar sequence

**ATGAGCCCAGAACGACGCCC**GGCCGACATCCGCCGTGCCACCGAGGCGGACATGCC  
GGCGGTCTGCACCATCGTCAACCACTACATCGAGACAAGCACGGTCAACTTCCGTAC  
CGAGCCGCAGGAACCGCAGGAGTGGACGGACGACCTCGTCCGTCTGCGGGAGCGCT  
ATCCCTGGCTCGTCGCCGAGGTGGACGGCGAGGTCGCCGGCATCGCCTACGCGGGCC  
CCTGGAAGGCACGCAACGCCTACGACTGGACGGCCGAGTCGACCGTGTACGTCTCCC  
CCCGCCACCAGCGGACGGGACTGGGCTCCACGCTCTACACCCACCTGCTGAAGTCCC  
TGGAGGCACAGGGCTTCAAGAGCGTGGTCGCTGTCATCGGGCTGCCCAACGACCCGA  
GCGTGCGCATGCACGAGGCGCTCGGATATGCCCCCGCGGCATGCTGCGGGCGGCCG  
GCTTCAAGCACGGGAACCTGGCATGACGTGGGTTTCTGGCAGCTGGACTTCAGCCTGC  
CGGTACCGCCCCGTCCGGTCC**TGCCCCGTACCGAGATCTGA**
